# Supplementary material for: Carbon Nanostructure/Zeolite Y Composites as Supports for Monometallic and Bimetallic Hydrocracking Catalysts
Source: MDPI journal article supplement (doi:10.3390/nano12183246), 2022-09-19
Supplement: s1 [file s1]

## *Supporting Material*

### **Carbon Nanostructure/Zeolite Y Composites as Supports for Monometallic and Bimetallic Hydrocracking Catalysts**

Roba Saab <sup>1</sup>, Kyriaki Polychronopoulou <sup>1,2,\*</sup>, Dalaver H. Anjum <sup>2,3</sup>, Nikolaos Charisiou <sup>4</sup>,  
Maria A. Goula <sup>4</sup>, Steven J. Hinder <sup>5</sup>, Mark A. Baker <sup>5</sup> and Andreas Schiffer <sup>1,\*</sup>

<sup>1</sup> Department of Mechanical Engineering, Khalifa University of Science and Technology, Abu  
Dhabi 127788, United Arab Emirates

<sup>2</sup> Center for Catalysis and Separations, Khalifa University of Science and Technology, Abu  
Dhabi 127788, United Arab Emirates

<sup>3</sup> Department of Physics, Khalifa University of Science and Technology, Abu Dhabi 127788,  
United Arab Emirates

<sup>4</sup> Department of Chemical Engineering, University of Western Macedonia, Koila, 50100 Kozani,  
Greece

<sup>5</sup> The Surface Analysis Laboratory, Faculty of Engineering and Physical Sciences, University of  
Surrey, Guild-ford GU2 4DL, UK

---

\* Corresponding authors:

Email: [andreas.schiffer@ku.ac.ae](mailto:andreas.schiffer@ku.ac.ae) (A. Schiffer), [kyriaki.polychrono@ku.ac.ae](mailto:kyriaki.polychrono@ku.ac.ae) (K. Polychronopoulou)

## S1. Catalyst textural characterization

**Table S1:** Textural properties of the CNT/Ni-ZY30 catalysts prepared under varied conditions.

| Catalyst composition   | BET surface area (m <sup>2</sup> /g) | Pore volume (cm <sup>3</sup> /g) |          |       |
|------------------------|--------------------------------------|----------------------------------|----------|-------|
|                        |                                      | Micropore                        | Mesopore | Total |
| CNT/Ni-ZY30 (500C, 2h) | 612                                  | 0.22                             | 0.22     | 0.44  |
| CNT/Ni-ZY30 (500C, 4h) | 584                                  | 0.21                             | 0.22     | 0.43  |
| CNT/Ni-ZY30 (650C, 2h) | 601                                  | 0.23                             | 0.22     | 0.45  |
| CNT/Ni-ZY30 (650C, 4h) | 576                                  | 0.22                             | 0.22     | 0.44  |

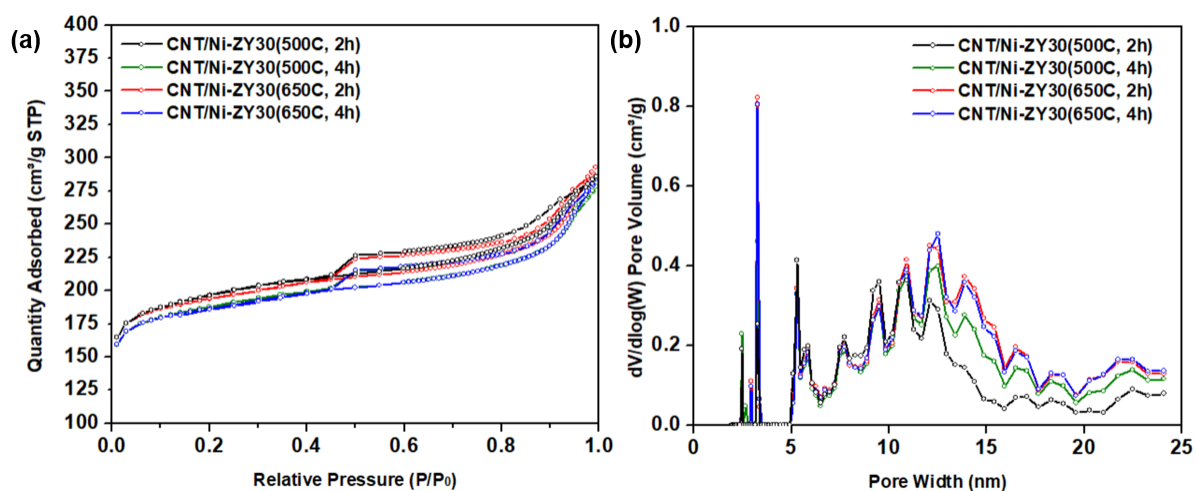

**Figure S1:** (a) N<sub>2</sub> adsorption-desorption isotherms at 77 K, and (b) DFT pore size distributions (PSD) for the CNT/Ni-ZY30 catalysts prepared under varied conditions.

## S2. Catalyst structural characterization

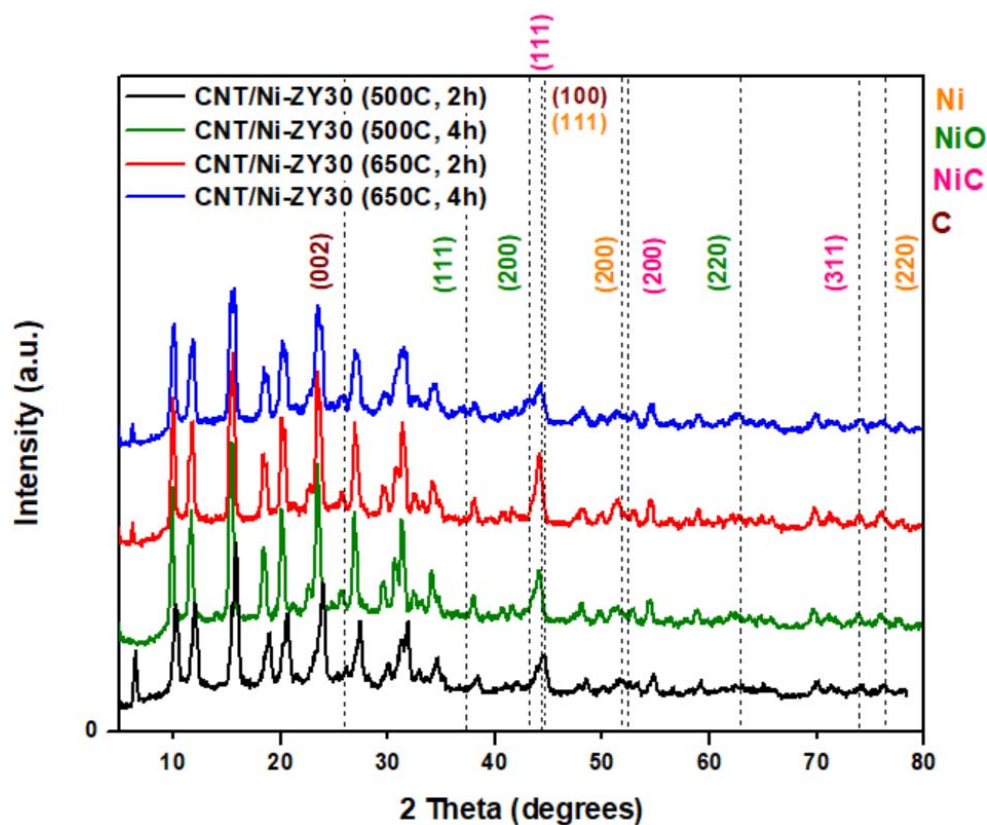

**Figure S2:** XRD patterns of the CNT/Ni-ZY30 catalysts prepared under varied conditions.

**Table S2:** EDX-TEM elemental composition of Ni-W-ZY30.

|          | O K  | Al K | Si K | Ni K | W L | Si/Al | nominal Si/Al<br>(atomic ratio) |
|----------|------|------|------|------|-----|-------|---------------------------------|
| Weight % | 56.1 | 2.2  | 34.8 | 1.7  | 5.2 | 15.7  | 15.8                            |
| Atomic % | 71.8 | 1.7  | 25.4 | 0.6  | 0.6 | 15.1  | 15.0                            |

### S3. Catalytic performance studies

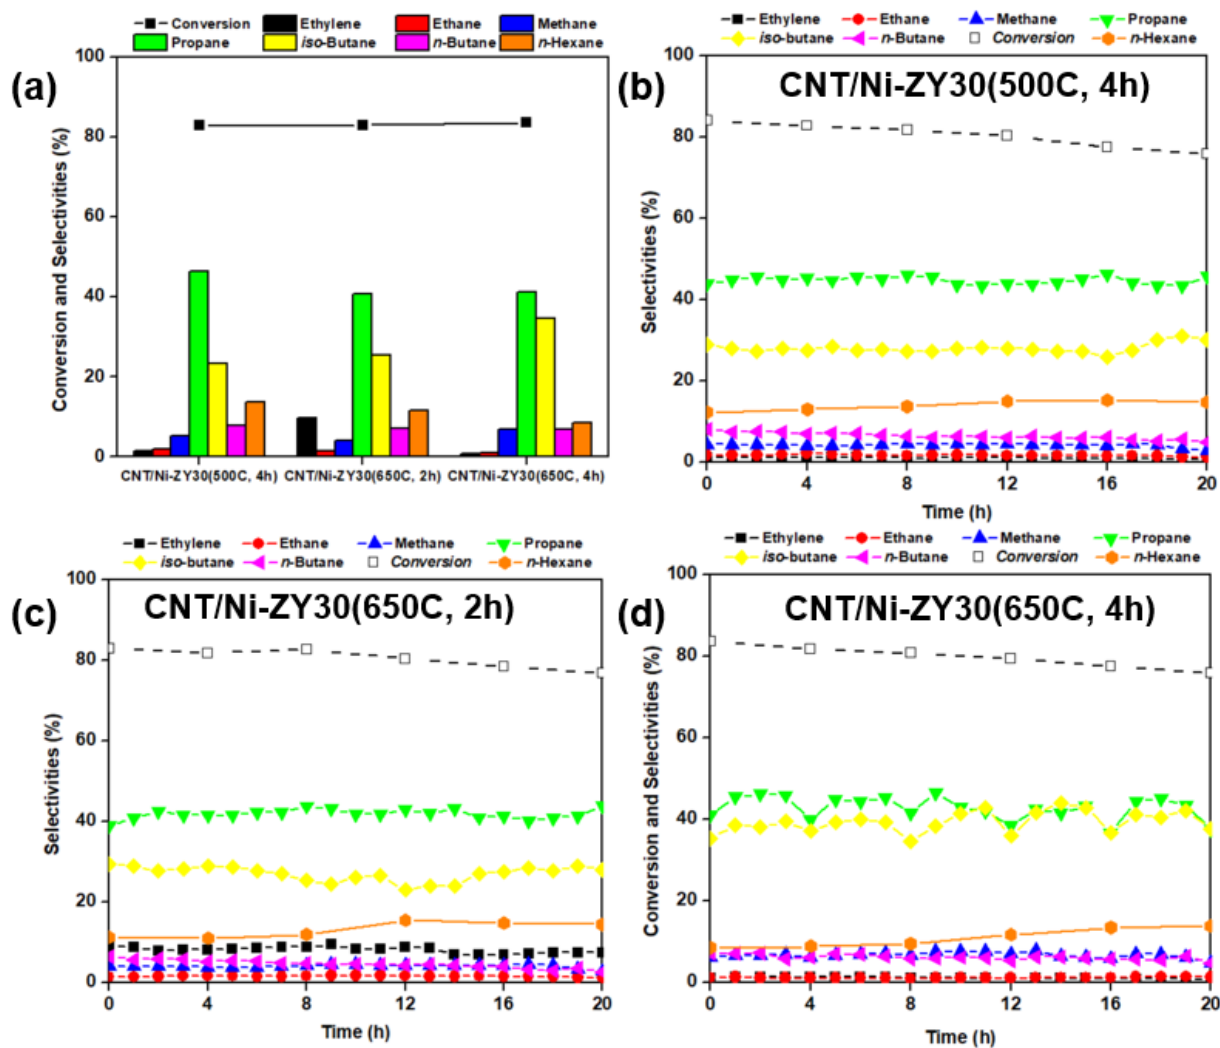

**Figure S3:** (a) Conversion and selectivity percentages of the main products for the CNT/Ni-ZY30 catalysts prepared under varied conditions, as well as (b-d) conversion and selectivity results over 20 h time-on-stream.

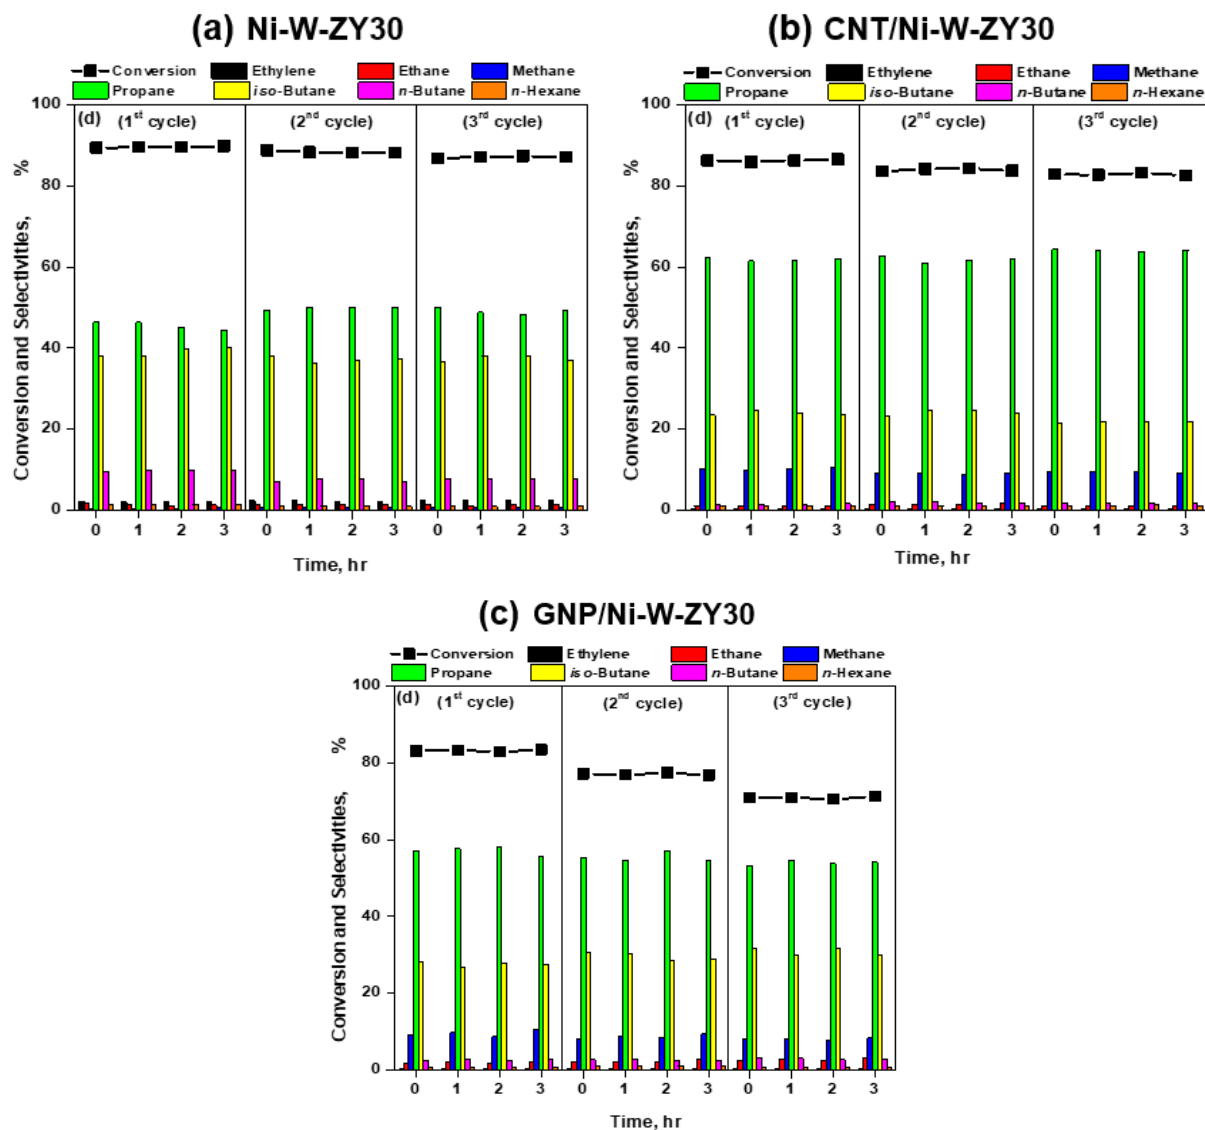

**Figure S4:** Conversion and selectivity percentages of the main products for (a) Ni-W-ZY30, (b) CNT/Ni-W-ZY30, and (c) GNP/Ni-W-ZY30 catalysts after regenerating them for three cycles.
